# Supplementary figures and images for: T-cell priming by dendritic cells in lymph nodes occurs in three distinct phases
Source: Springer Nature journal article supplement (doi:10.1038/nature02238), 2004-01-01

a

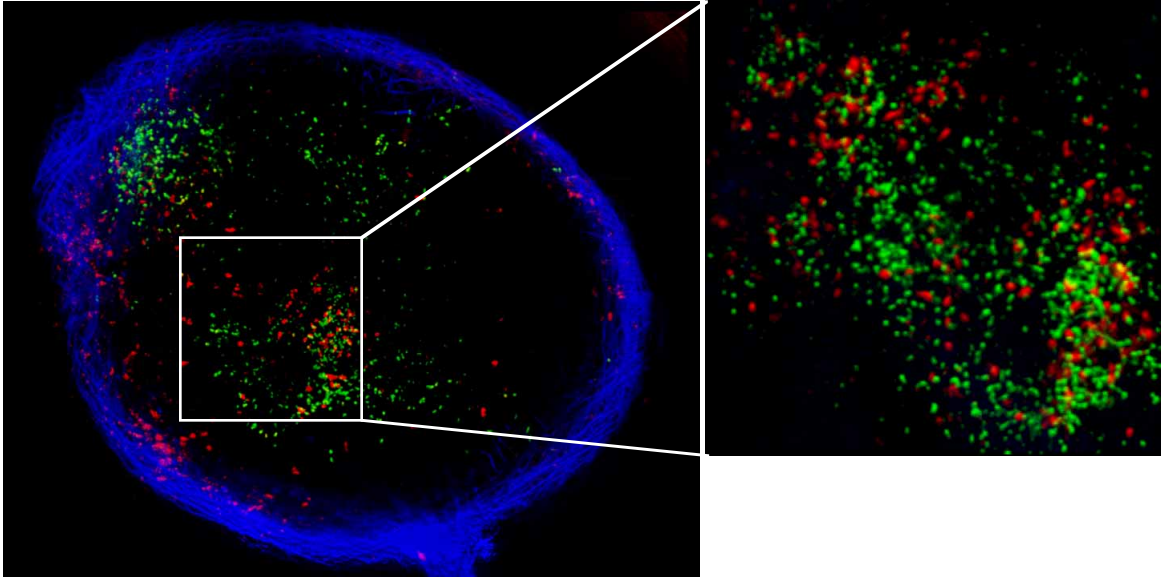

b

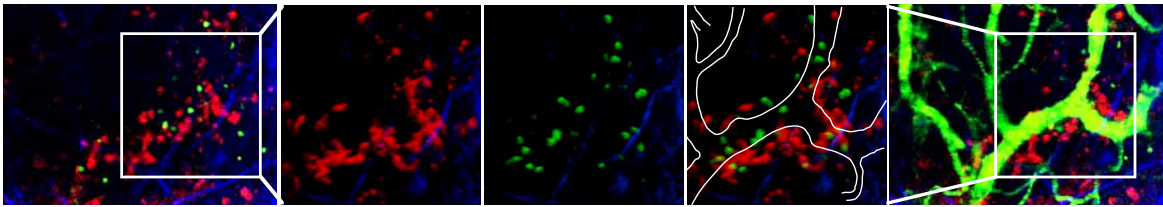

Supplement: 41586_2004_BFnature02238_MOESM1_ESM.pdf [file 41586_2004_BFnature02238_MOESM1_ESM.pdf]

a

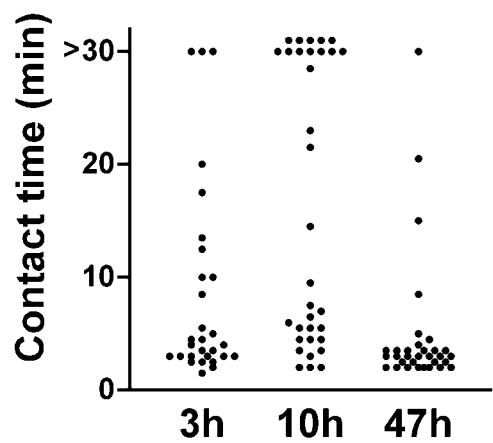

b

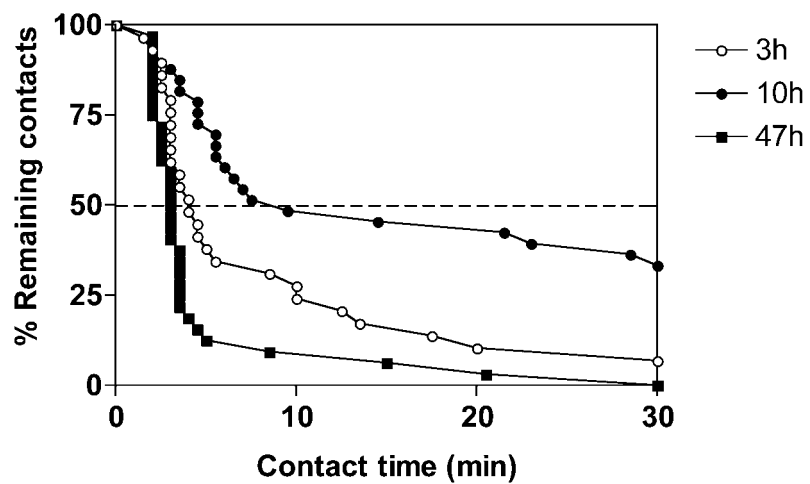

Supplement: 41586_2004_BFnature02238_MOESM2_ESM.pdf [file 41586_2004_BFnature02238_MOESM2_ESM.pdf]

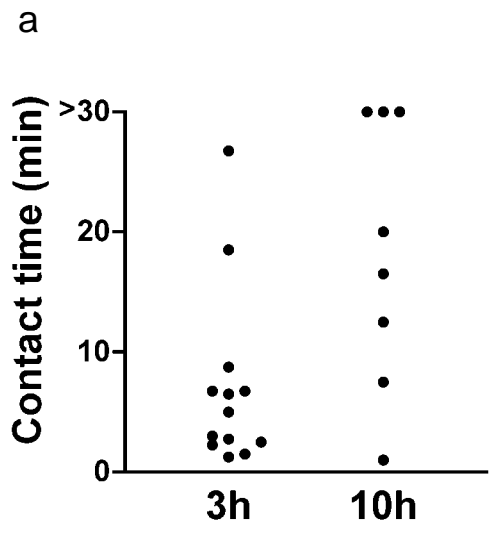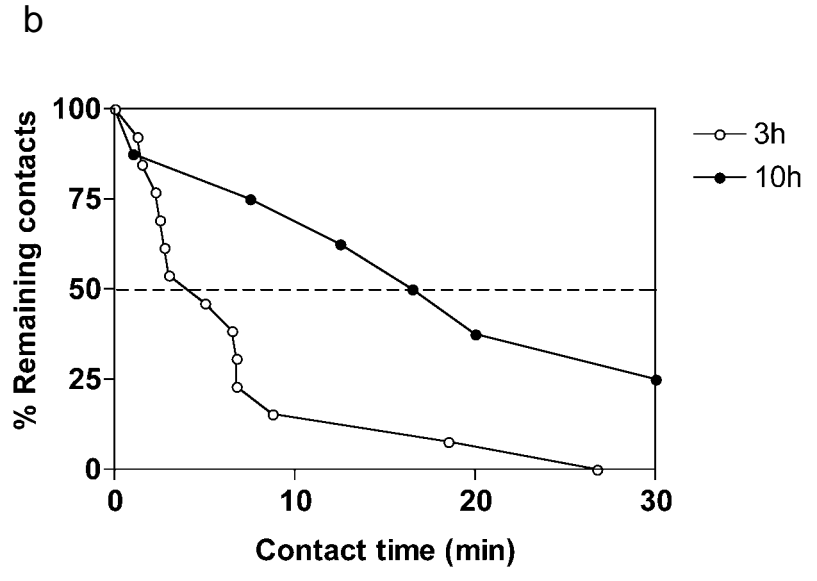

Supplement: 41586_2004_BFnature02238_MOESM3_ESM.pdf [file 41586_2004_BFnature02238_MOESM3_ESM.pdf]
